# Supplementary material
Source: PubMed Central journal article supplement (PMC6930849)

# Supplementary Figure 1

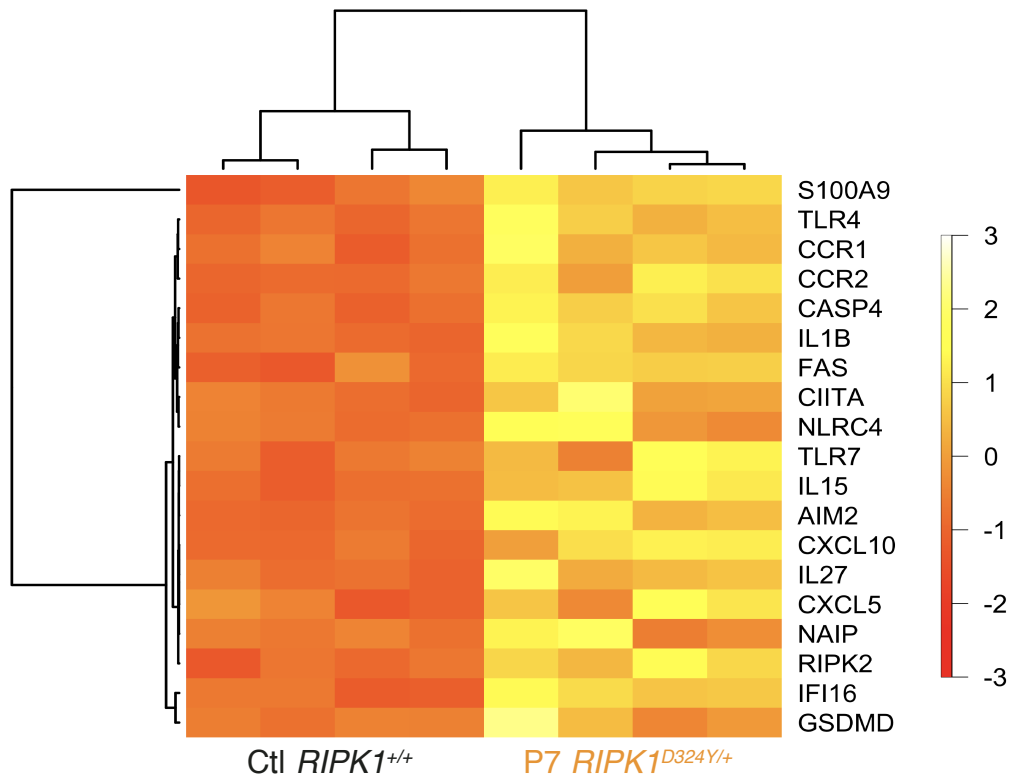

**Supplementary Figure 1 | RNA sequencing of whole blood RNA from P7** (two time points, as in Fig. 1c) and 2 unrelated adolescent healthy controls, both with technical duplicates. Heatmap shows differentially expressed inflammatory response genes (GO:0006954).

# Supplementary Figure 2

## Figure 1f

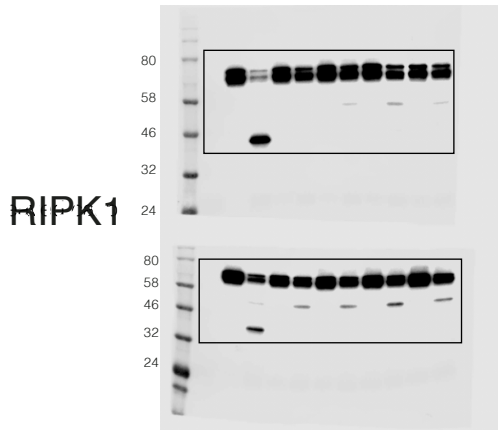

## Extended Data Figure 5a

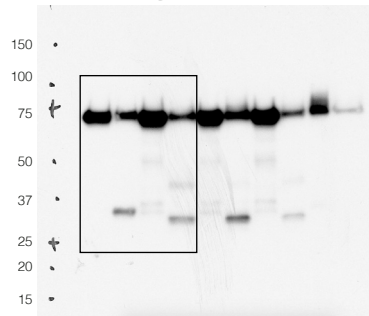

reprobe of RIPK1

## Extended Data Figure 5b

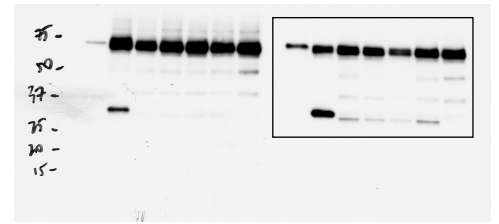

ACTIN

## Figure 3b

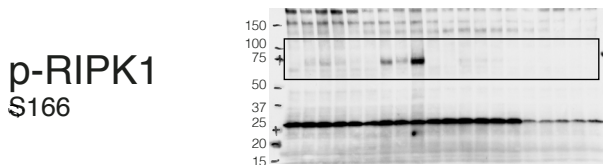

RIPK1

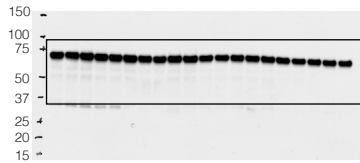

reprobe of p-RIPK1

p-RIPK3  
T231, S232

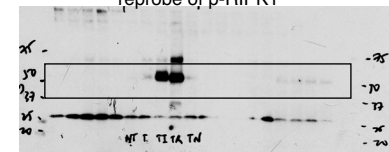

## Figure 3d

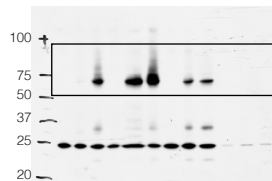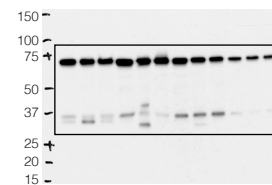

reprobe of RIPK1

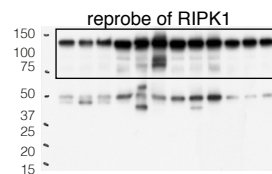

## Extended Data Figure 4d

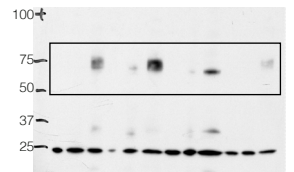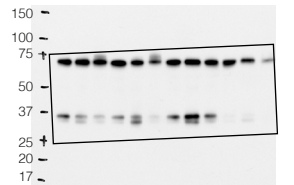

reprobe of RIPK1

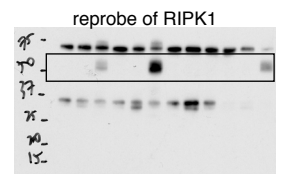

cleav.  
CASP-8

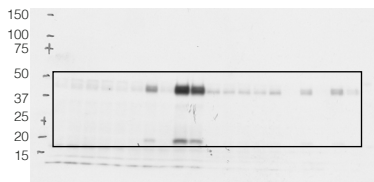

cleav.  
CASP-3

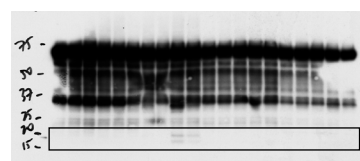

reprobe of cleav. casp8

ACTIN

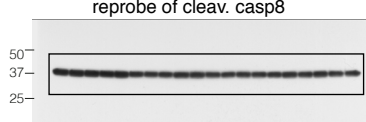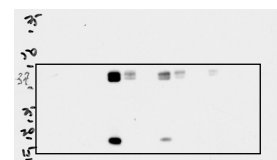

reprobe of cleav. casp8

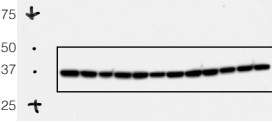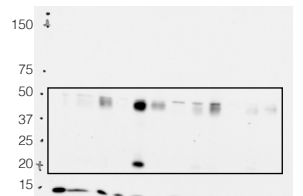

reprobe of cleav. casp8

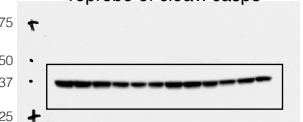

### Extended Data Figure 4g

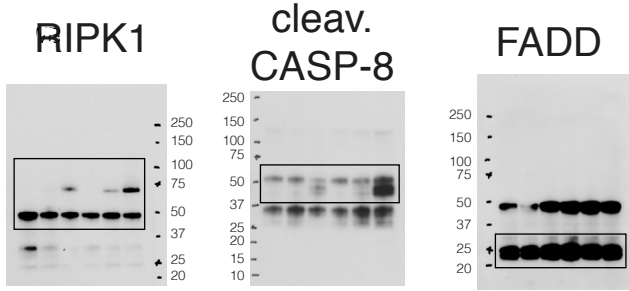

### Extended Data Figure 6e

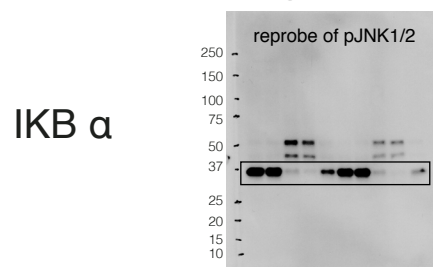

### Extended Data Figure 6f

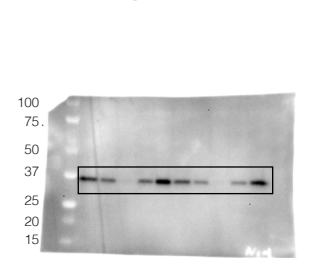

### Extended Data Figure 4e

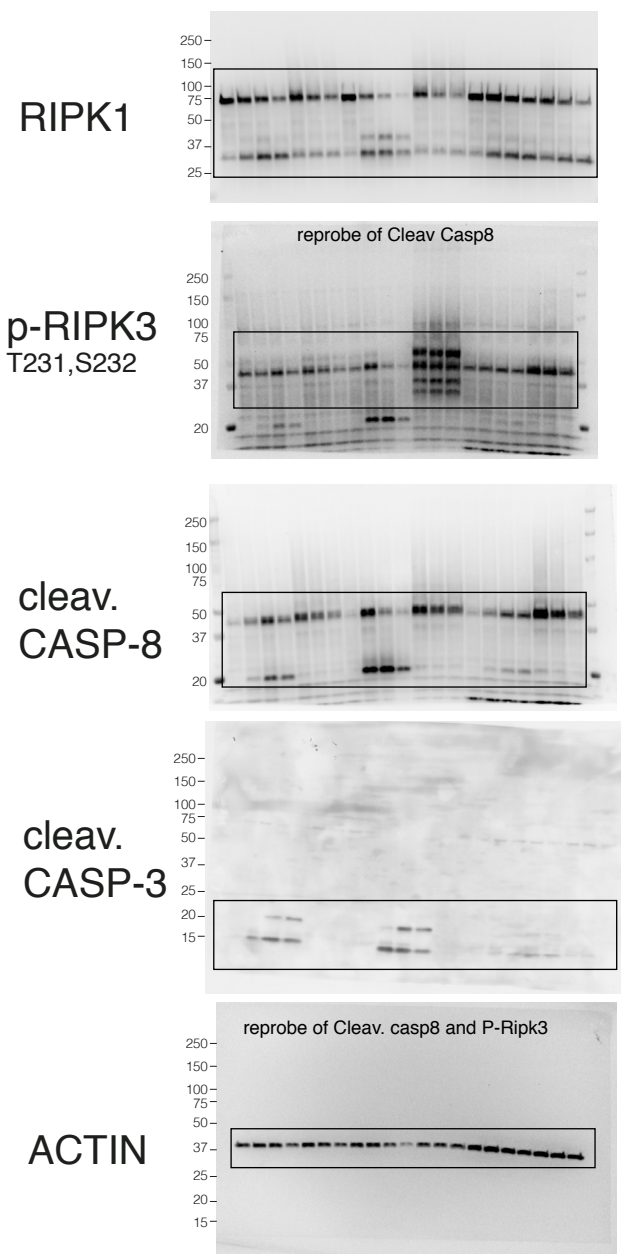

### p-P65

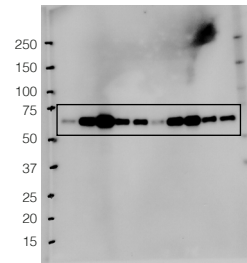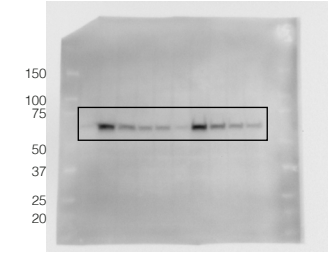

### p-JNK1/2

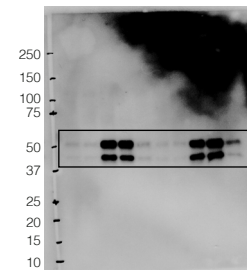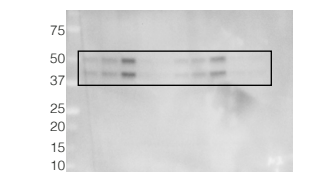

### p-P38

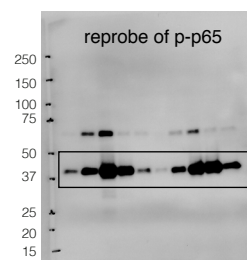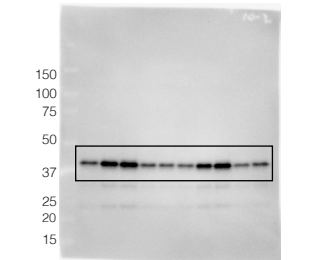

### p-ERK1/2

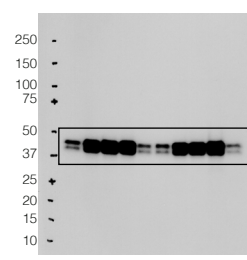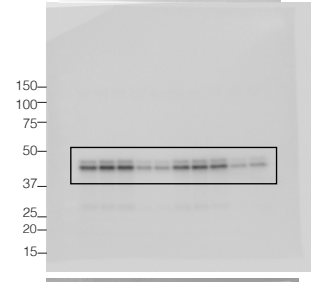

### ACTIN

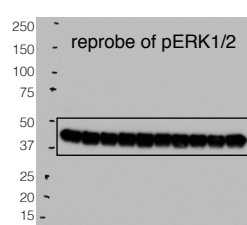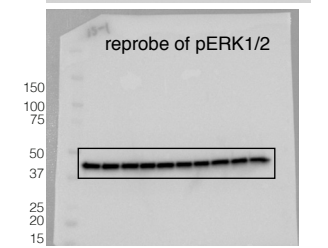

### Extended Data Figure 4f

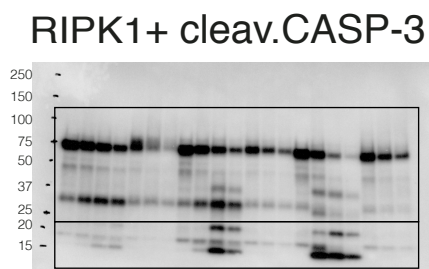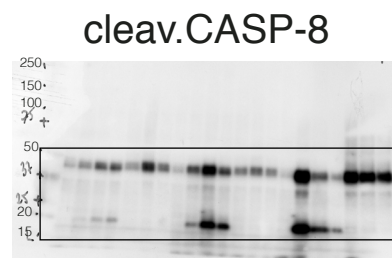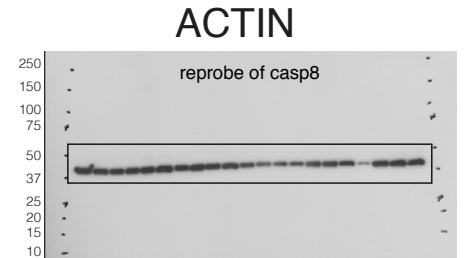

Supplement: EMS84659-supplement-Sup_Fig__1.pdf [file EMS84659-supplement-Sup_Fig__1.pdf]
