# Supplementary material
Source: PubMed Central journal article supplement (PMC6930849)

Figure 1f

Extended Data  
Figure 5a

Extended Data  
Figure 5b

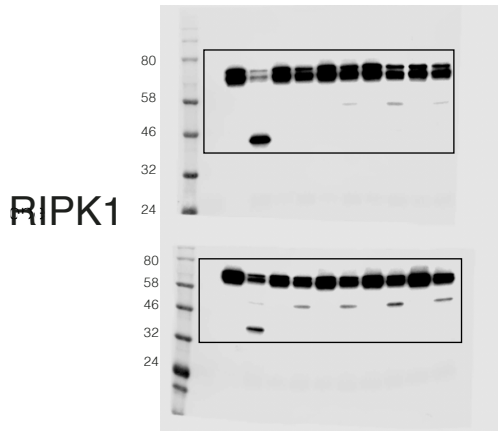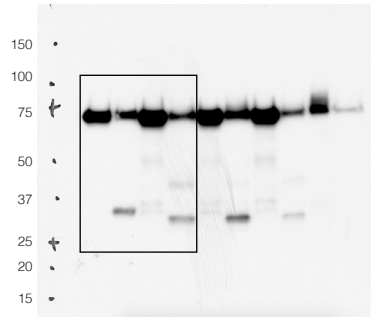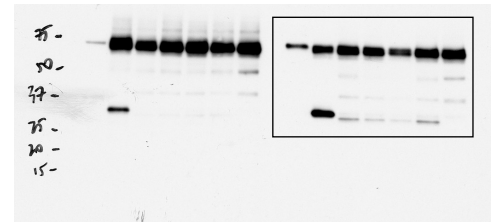

ACTIN

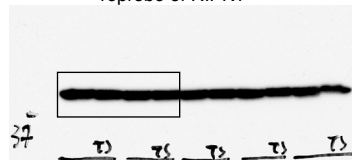

Figure 3b

Figure 3d

Extended Data  
Figure 4d

p-RIPK1  
S166

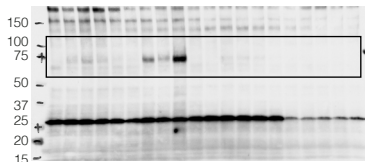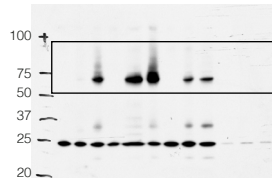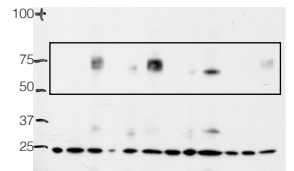

RIPK1

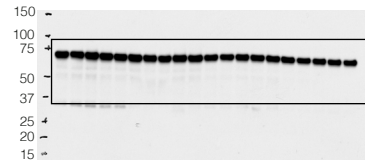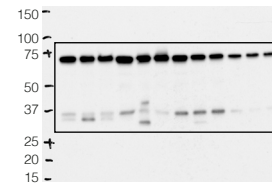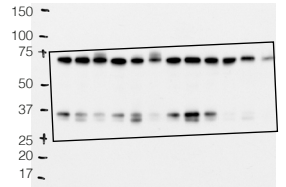

reprobe of p-RIPK1

p-RIPK3  
T231, S232

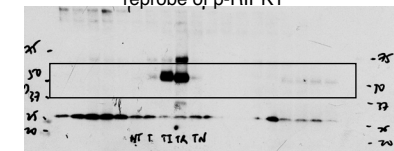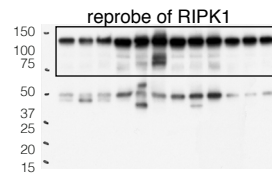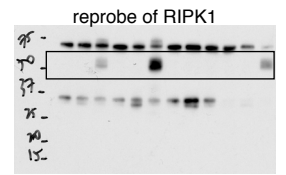

cleav.  
CASP-8

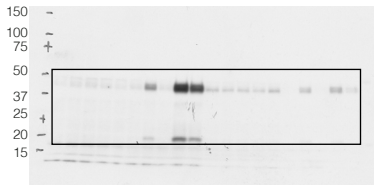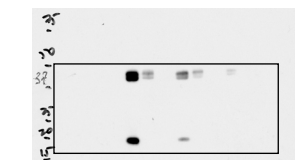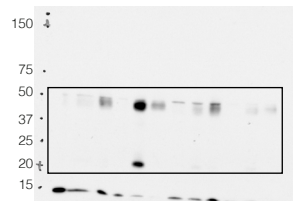

cleav.  
CASP-3

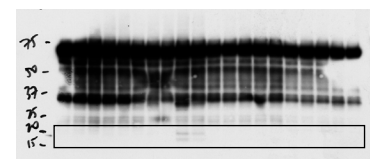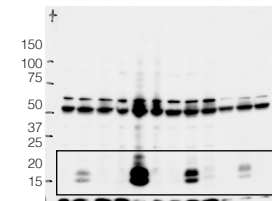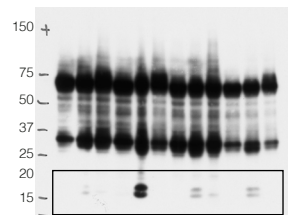

reprobe of cleav. casp8

ACTIN

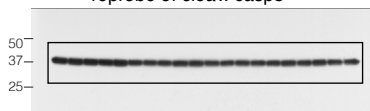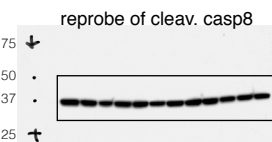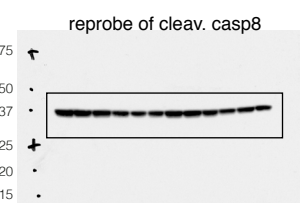

### Extended Data Figure 4g

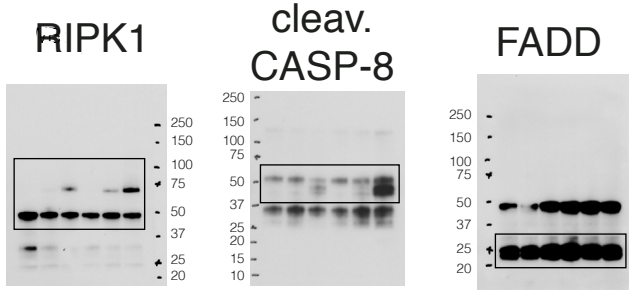

### Extended Data Figure 6e

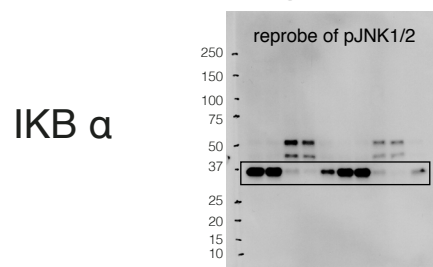

### Extended Data Figure 6f

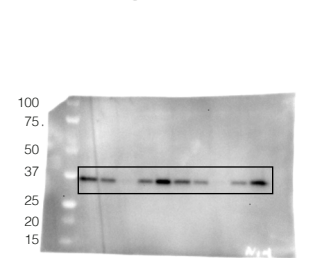

### Extended Data Figure 4e

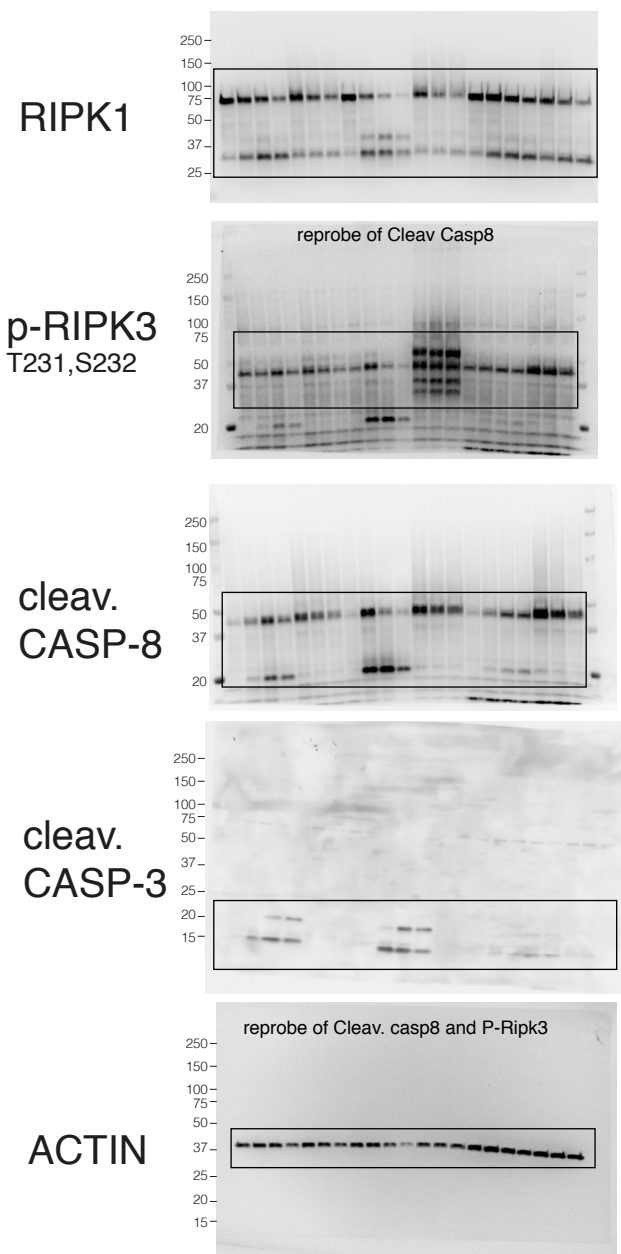

### p-P65

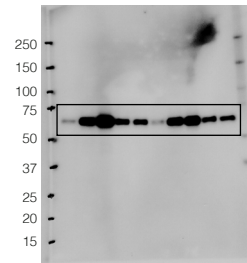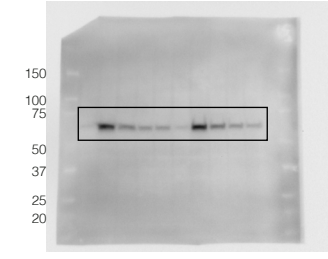

### p-JNK1/2

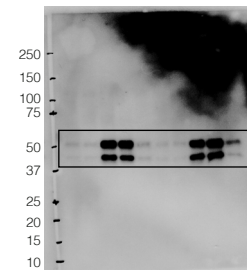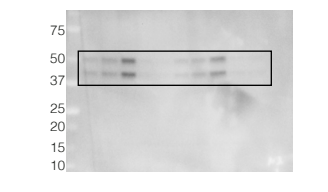

### p-P38

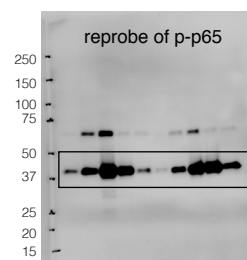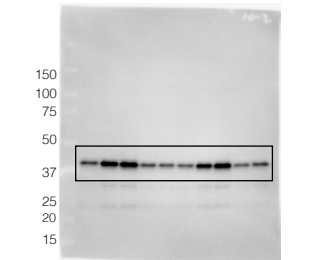

### p-ERK1/2

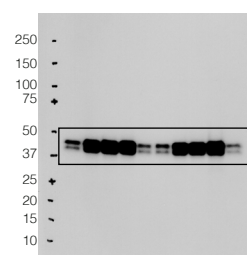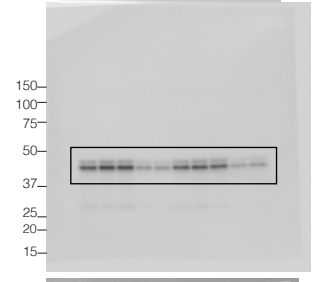

### ACTIN

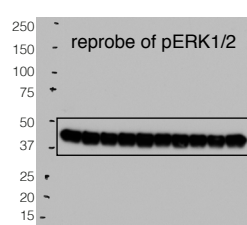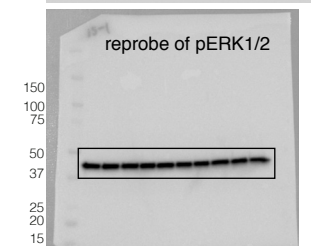

### Extended Data Figure 4f

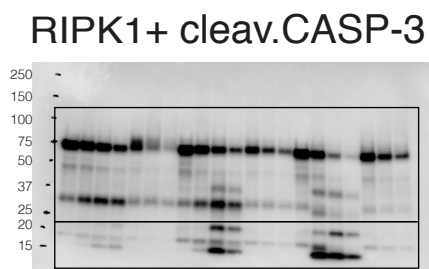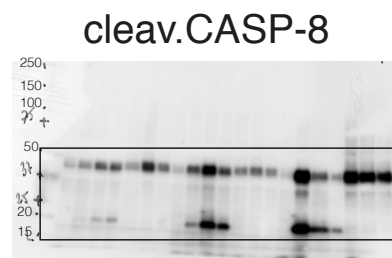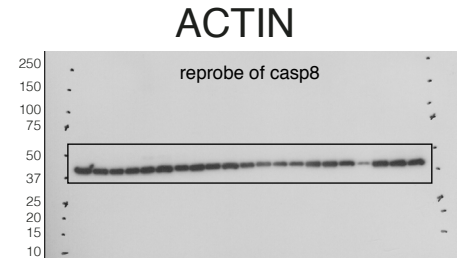

Supplement: EMS84659-supplement-Sup_Fig__2.pdf [file EMS84659-supplement-Sup_Fig__2.pdf]
